# Supplementary material
Source: HighWire-hosted journal article supplement (https://jme.bmj.com/highwire/filestream/151773/field_highwire_adjunct_files/0/medethics-2022-108268supp001_data_supplement.pdf)
Supplement: medethics-2022-108268supp001_data_supplement.pdf [file medethics-2022-108268supp001_data_supplement.pdf]

**APPENDIX 1: STUDY QUESTIONNAIRE****Section 1: Participant Information**

1. In which specialty have you spent the majority of the pandemic working (i.e. March 2020-present)?

|                         |                          |                 |                          |
|-------------------------|--------------------------|-----------------|--------------------------|
| A&E                     | <input type="checkbox"/> | Ophthalmology   | <input type="checkbox"/> |
| ENT/ Max fax            | <input type="checkbox"/> | Orthopaedics    | <input type="checkbox"/> |
| Internal Medicine       | <input type="checkbox"/> | Paediatrics     | <input type="checkbox"/> |
| ITU/ Anaesthetics       | <input type="checkbox"/> | Palliative Care | <input type="checkbox"/> |
| General Practice        | <input type="checkbox"/> | Psychiatry      | <input type="checkbox"/> |
| General Surgery         | <input type="checkbox"/> | Urology         | <input type="checkbox"/> |
| Gynaecology/ Obstetrics | <input type="checkbox"/> | Other:          | <input type="checkbox"/> |

If other, please state:

2. Tick all other specialities you have worked in since March 2020

|                         |                          |                 |                          |
|-------------------------|--------------------------|-----------------|--------------------------|
| A&E                     | <input type="checkbox"/> | Ophthalmology   | <input type="checkbox"/> |
| ENT/ Max fax            | <input type="checkbox"/> | Orthopaedics    | <input type="checkbox"/> |
| Internal Medicine       | <input type="checkbox"/> | Paediatrics     | <input type="checkbox"/> |
| ITU/ Anaesthetics       | <input type="checkbox"/> | Palliative Care | <input type="checkbox"/> |
| General Practice        | <input type="checkbox"/> | Psychiatry      | <input type="checkbox"/> |
| General Surgery         | <input type="checkbox"/> | Urology         | <input type="checkbox"/> |
| Gynaecology/ Obstetrics | <input type="checkbox"/> | Other:          | <input type="checkbox"/> |

If other, please state:

3. What level of doctor are you?

|                   |                          |
|-------------------|--------------------------|
| FY1               | <input type="checkbox"/> |
| SHO or equivalent | <input type="checkbox"/> |
| SpR or equivalent | <input type="checkbox"/> |
| Consultant/ GP    | <input type="checkbox"/> |
| Other             | <input type="checkbox"/> |

If other, please state:

**Section 2: DNACPR Decisions**

4. Do you think that you are making more or less patients DNACPR **now** compared with pre-pandemic (pre-March 2020)?

|                    |  |
|--------------------|--|
| Significantly Less |  |
| Somewhat Less      |  |
| Same or Unsure     |  |
| Somewhat More      |  |
| Significantly More |  |

5. In making DNACPR decisions **pre-pandemic**, which factors significantly contributed to your decision making? (tick all that apply)

|                        |  |
|------------------------|--|
| Likely futility of CPR |  |
| Frailty score          |  |
| Co-morbidities         |  |
| Age                    |  |
| Patient Wishes         |  |
| Advance Care Plans     |  |

|                                  |  |
|----------------------------------|--|
| Family Wishes                    |  |
| Quality of Life Pre-arrest       |  |
| Likely Quality of Life Post-ROSC |  |
| Limited Resources e.g. ITU beds  |  |
| Others                           |  |
|                                  |  |

If others, please state:

6. In making DNACPR decisions **now**, which factors significantly contribute to your decision making? (tick all that apply)

|                        |  |
|------------------------|--|
| Likely futility of CPR |  |
| Frailty score          |  |
| Co-morbidities         |  |
| Age                    |  |
| Patient Wishes         |  |
| Advance Care Plans     |  |

|                                  |  |
|----------------------------------|--|
| Family Wishes                    |  |
| Quality of Life Pre-arrest       |  |
| Likely Quality of Life Post-ROSC |  |
| Limited Resources e.g. ITU beds  |  |
| Others                           |  |
|                                  |  |

If others, please state:

7. If your decision-making processes around DNACPRs have changed since the pandemic, can you explain why? (optional)

Section 3: Treatment Escalation

8. Do you think you have a lower or higher threshold for referring (or accepting) patients to ITU, **now** compared with pre-pandemic?

|                                            |  |
|--------------------------------------------|--|
| Significantly Lower (i.e. referring more)  |  |
| Somewhat Lower                             |  |
| Same or Unsure                             |  |
| Somewhat Higher                            |  |
| Significantly Higher (i.e. referring less) |  |

9. Do you think you have a lower or higher threshold for palliating patients, **now** compared with pre-pandemic?

|                                             |  |
|---------------------------------------------|--|
| Significantly Lower (i.e. palliating more)  |  |
| Somewhat Lower                              |  |
| Same or Unsure                              |  |
| Somewhat Higher                             |  |
| Significantly Higher (i.e. palliating less) |  |

10. If your thresholds for escalation and/or palliation have changed since the start of the pandemic, can you explain why? (optional)

#### Section 4: Euthanasia and Physician-Assisted Suicide

11. How would you describe your views on the legalisation of euthanasia, **pre-pandemic (pre-2020)**?

|                    |  |
|--------------------|--|
| Strongly Opposed   |  |
| Somewhat Opposed   |  |
| Neutral or Unsure  |  |
| Somewhat In Favour |  |
| Strongly In Favour |  |

12. How would you describe your views on the legalisation of physician-assisted suicide, **pre-pandemic (pre-2020)**?

|                  |  |
|------------------|--|
| Strongly Opposed |  |
| Somewhat Opposed |  |

|                    |  |
|--------------------|--|
| Neutral or Unsure  |  |
| Somewhat In Favour |  |
| Strongly In Favour |  |

13. How would you describe your views on the legalisation of euthanasia **now**?

|                    |  |
|--------------------|--|
| Strongly Opposed   |  |
| Somewhat Opposed   |  |
| Neutral or Unsure  |  |
| Somewhat In Favour |  |
| Strongly In Favour |  |

14. How would you describe your views on the legalisation of physician-assisted suicide, **now**?

|                    |  |
|--------------------|--|
| Strongly Opposed   |  |
| Somewhat Opposed   |  |
| Neutral or Unsure  |  |
| Somewhat In Favour |  |
| Strongly In Favour |  |

15. If your views on euthanasia and/or physician-assisted suicide have changed since the start of the pandemic, can you explain why? (optional)

|  |
|--|
|  |
|--|

#### Section 5: Conclusion

16. Are there any other ways in which covid has changed the ways you make end of life decisions? (optional)

|  |
|--|
|  |
|--|
